# Supplementary material
Source: bioRxiv or medRxiv preprint supplement (http://medrxiv.stage.highwire.org/highwire/filestream/93473/field_highwire_adjunct_files/0/2020.08.15.20175562-1.pdf)
Supplement: Supplementary file [file 2020.08.15.20175562-1.pdf]

## SUPPLEMENTARY MATERIALS

### Supplementary Material A – Variable definition

Appointment attendance, consultation medium and ethnicity were grouped based on theoretical grounds. Appointment attendance was classified on the basis on patients having clinical contact, with cancellation groupings remaining the same. Consultation medium was classified on the basis on appointments taking place in person or remotely, with a separate level when it was not possible to determine this distinction. Ethnicity was divided into majority and minority ethnic groups. Referral source was reduced on the basis on available data points for each level, retaining the original labels for the two primary referral sources. Missing data was labelled as unknown if there was no entry recorded or the data entry indicated that the measurement was not available.

*Supplementary Table 1. Variable definition*

| Variable                   | Class       | Levels                                                                                                                                                                                                                                                                                                                                                                                                                                                                                                                           | Data Source | Measurement      |
|----------------------------|-------------|----------------------------------------------------------------------------------------------------------------------------------------------------------------------------------------------------------------------------------------------------------------------------------------------------------------------------------------------------------------------------------------------------------------------------------------------------------------------------------------------------------------------------------|-------------|------------------|
| <i>Referral-Level Data</i> |             |                                                                                                                                                                                                                                                                                                                                                                                                                                                                                                                                  |             |                  |
| Referrals                  | Count       | N.A.                                                                                                                                                                                                                                                                                                                                                                                                                                                                                                                             | IAPT MDS    | System capture   |
| Referral Source            | Categorical | Self-Referral<br>Primary Healthcare<br>Other<br><i>Local Authority Services</i><br><i>Employer</i><br><i>Justice System</i><br><i>Child Health</i><br><i>Independent/Voluntary Sector</i><br><i>Acute Secondary Care</i><br><i>Other Mental Health NHS Trust</i><br><i>Internal referrals from Community Mental Health Team (within own NHS Trust)</i><br><br><i>Internal referrals from Inpatient Service (within own NHS Trust)</i><br><i>Transfer by graduation (within own NHS Trust)</i><br><br><i>Other</i><br><i>IAPT</i> | IAPT MDS    | Clinician report |
| Age                        | Continuous  | N.A.                                                                                                                                                                                                                                                                                                                                                                                                                                                                                                                             | IAPT MDS    | Self-report      |
| Gender                     | Categorical | Female<br>Male<br>Unknown<br><i>Not known</i><br><i>Not specified</i><br><i>Missing</i>                                                                                                                                                                                                                                                                                                                                                                                                                                          | IAPT MDS    | Self-report      |
| Ethnicity                  | Categorical | White<br>Black, Asian and ethnic minority<br><i>Black</i><br><i>Asian</i><br><i>Mixed</i><br><i>Other</i><br>Unknown<br><i>Not Stated</i><br><i>Not Known</i><br><i>Missing</i>                                                                                                                                                                                                                                                                                                                                                  | IAPT MDS    | Self-report      |

|                                                       |             |                                                                                                                                                                                                                                                                                                                                                                                                        |              |                  |
|-------------------------------------------------------|-------------|--------------------------------------------------------------------------------------------------------------------------------------------------------------------------------------------------------------------------------------------------------------------------------------------------------------------------------------------------------------------------------------------------------|--------------|------------------|
| Long-Term Condition Status                            | Categorical | Long-Term Condition                                                                                                                                                                                                                                                                                                                                                                                    | IAPT MDS     | Self-report      |
|                                                       |             | No Long-Term Condition                                                                                                                                                                                                                                                                                                                                                                                 |              |                  |
|                                                       |             | Unknown                                                                                                                                                                                                                                                                                                                                                                                                |              |                  |
|                                                       |             | <i>Unknown (Person asked and does not know or is not sure)</i>                                                                                                                                                                                                                                                                                                                                         |              |                  |
|                                                       |             | <i>Not Stated (Person asked but declined to provide a response)</i>                                                                                                                                                                                                                                                                                                                                    |              |                  |
|                                                       |             | <i>Missing</i>                                                                                                                                                                                                                                                                                                                                                                                         |              |                  |
| Previous Referrals                                    | Continuous  | N.A.                                                                                                                                                                                                                                                                                                                                                                                                   | IAPT MDS     | System capture   |
| Baseline Patient Health Questionnaire-9 (PHQ-9)       | Continuous  | N.A.                                                                                                                                                                                                                                                                                                                                                                                                   | IAPT MDS     | Self-report      |
| Baseline Generalised Anxiety Disorder Scale-7 (GAD-7) | Continuous  | N.A.                                                                                                                                                                                                                                                                                                                                                                                                   | IAPT MDS     | Self-report      |
| Index of Multiple Deprivation (IMD)                   | Continuous  | N.A.                                                                                                                                                                                                                                                                                                                                                                                                   | ONS database | Self-report      |
| People per Km <sup>2</sup>                            | Continuous  | N.A.                                                                                                                                                                                                                                                                                                                                                                                                   | ONS database | Self-report      |
| <b><i>Appointment-Level Data</i></b>                  |             |                                                                                                                                                                                                                                                                                                                                                                                                        |              |                  |
| Appointments                                          | Count       | N.A.                                                                                                                                                                                                                                                                                                                                                                                                   | IAPT MDS     | System capture   |
| Attendance                                            |             | Attended<br><i>Attended on time or, if late, before the relevant care professional was ready to see the patient</i><br><i>Arrived late, after the care professional was ready to see the patient, but was seen</i><br>Did not attend or Late<br><i>Patient arrived late and could not be seen</i><br><i>Did not attend - no advance warning given</i><br>Cancelled by patient<br>Cancelled by provider | IAPT MDS     | Clinician report |
| Consultation Medium                                   | Categorical | Face-to-face<br>Remote<br><i>Telephone</i><br><i>Telemedicine web camera</i><br><i>Email</i><br><i>Short Message Service (SMS)</i><br>Other<br><i>Other</i><br><i>Talk type for a Person unable to speak</i><br>Unknown<br>Missing                                                                                                                                                                     | IAPT MDS     | Clinician report |

IAPT MDS - Improving Access to Psychological Therapies Minimum Dataset; ONS - Office of National Statistics
